# Supplementary material
Source: PubMed Central journal article supplement (PMC3993381)
Supplement: IAI.01377-13_zii999090607so1.pdf [file IAI.01377-13_zii999090607so1.pdf]

## **Supplemental Materials**

**1) Table S1-S3**

**2) Figure S1, S2 with figure legends**

**3) References**

**Table S1.** Bacterial strains used in this study.

| Strain                      | Relevant genotype                                                                                                                                             | Reference/resource |
|-----------------------------|---------------------------------------------------------------------------------------------------------------------------------------------------------------|--------------------|
| <i>E. coli</i>              |                                                                                                                                                               |                    |
| DH5 $\alpha$ $\lambda$ pir  | <i>sup E44, <math>\Delta</math>lacU169 (<math>\Phi</math>lacZ<math>\Delta</math>M15), recA1, endA1, hsdR17, thi-1, gyrA96, relA1, <math>\lambda</math>pir</i> | Lab collections    |
| SM10 $\lambda$ pir          | <i>Km<sup>R</sup>, thi-1, thr, leu, tonA, lacY, supE, recA::RP4-2-Tc::Mu, <math>\lambda</math>pir</i>                                                         | Lab collections    |
| XL1-Blue                    | <i>endA1 gyrA96 thi-1 hsdR17 supE44 relA1 lac</i>                                                                                                             | Lab collections    |
| BTH101                      | <i>F-, cya-99, araD139, galE15, galK16, rpsL1 (Strr), hsdR2, mcrA1, mcrB1</i>                                                                                 | (1)                |
| BTH101 $\Delta$ <i>dsbA</i> | BTH101 $\Delta$ <i>dsbA</i>                                                                                                                                   | (2)                |
| <i>V. cholerae</i>          |                                                                                                                                                               |                    |
| C6706                       | wild type, El Tor C6706, Sm <sup>r</sup>                                                                                                                      | (3)                |
| LZV441                      | C6706 $\Delta$ <i>toxRS, <math>\Delta</math>tcpPH,</i>                                                                                                        | This study         |
| LZV1122                     | C6706 $\Delta$ <i>dsbA <math>\Delta</math>toxRS, <math>\Delta</math>tcpPH,</i> Sm <sup>r</sup>                                                                | This study         |

**Table S2.** Plasmids used in this study.

| Plasmid                                     | Relevant property                                                                                     | Reference  |
|---------------------------------------------|-------------------------------------------------------------------------------------------------------|------------|
| pWM91                                       | <i>oriR6KmobRP4</i> ; Ap <sup>r</sup>                                                                 | (4)        |
| pSRKtc                                      | <i>lac</i> promoter and <i>lacI<sup>q</sup></i> , Tet <sup>r</sup>                                    | (5)        |
| pACYC117                                    | Multicopy number cloning vector, Km <sup>r</sup>                                                      | NEB        |
| pUT18                                       | <i>lac</i> promoter and the T18 fragment for N-terminal heterologous protein fusion. Amp <sup>r</sup> | (1)        |
| pUT18C                                      | pUT18-derived vector, designed to create C-terminal heterologous protein fusion, Amp <sup>r</sup>     | (1)        |
| pKT25                                       | <i>lac</i> promoter and the T25 fragment for C-terminal heterologous protein fusion. Km <sup>r</sup>  | (1)        |
| pKNT25                                      | pKT25-derived vector, designed to create N-terminal heterologous protein fusion. Km <sup>r</sup>      | (1)        |
| pUT18C-tcpPH                                | pUT18C-derived, <i>tcpPH</i> , Amp <sup>r</sup>                                                       | (2)        |
| pKT25- tcpPH                                | pKT25-derived, <i>tcpPH</i> , Amp <sup>r</sup>                                                        | (2)        |
| pUT18C-tcpPH(C207S)                         | pUT18C-derived, <i>tcpP (C207S)tcpH</i> , Amp <sup>r</sup>                                            | (2)        |
| pUT18C-tcpPH(C218S)                         | pUT18C-derived, <i>tcpP(C218S)tcpH</i> , Amp <sup>r</sup>                                             | (2)        |
| pUT18C-C <sub>p</sub> -tcpH                 | pUT18C-derived, <i>tcpP(1-142 aa)</i> , <i>tcpH</i> , Amp <sup>r</sup>                                | (2)        |
| pUT18C-C <sub>p</sub> -T <sub>p</sub> -tcpH | pUT18C-derived, <i>tcpP(1-176 aa)</i> , <i>tcpH</i> , Amp <sup>r</sup>                                | (2)        |
| pUT18C-T <sub>p</sub> -P <sub>p</sub> -tcpH | pUT18C-derived, <i>tcpP(143-223 aa)</i> , <i>tcpH</i> , Amp <sup>r</sup>                              | (2)        |
| pACYC-tcpPH(C207S)                          | pACYC117-derived, <i>tcpP (C207S)</i> , <i>tcpH</i> , Km <sup>r</sup>                                 | (2)        |
| pACYC-tcpPH(C218S)                          | pACYC117-derived, <i>tcpP(C218S)</i> , <i>tcpH</i> , Km <sup>r</sup>                                  | (2)        |
| pWM91-Δvc0034(dsbA)                         | pWM91-derived, inframe deletion fragment of <i>dsbA</i> . Amp <sup>r</sup>                            | (2)        |
| pAH6-toxT-LacZ                              | <i>toxT - lacZ</i> transcriptional fusion reporter. Cm <sup>r</sup>                                   | (6)        |
| pUT18C-toxRS(C236S)                         | pUT18C-derived, <i>toxR(C236S)</i> , <i>toxS</i> , Amp <sup>r</sup>                                   | This study |
| pUT18C-toxRS                                | pUT18C-derived, <i>toxRS</i> , Amp <sup>r</sup>                                                       | This study |
| pUT18C-toxRS(C293S)                         | pUT18C-derived, <i>toxR(C293S)</i> , <i>toxS</i> , Amp <sup>r</sup>                                   | This study |
| pUT18C-C <sub>R</sub> -T <sub>R</sub>       | pUT18C-derived, <i>toxR (1-193 aa)</i> , <i>toxS</i> , Amp <sup>r</sup>                               | This study |
| pUT18C-C <sub>R</sub>                       | pUT18C-derived, <i>toxR (1-177 aa)</i> , <i>toxS</i> , Amp <sup>r</sup>                               | This study |
| pUT18C-T <sub>R</sub> -P <sub>R</sub>       | pUT18C-derived, <i>toxR(178-293 aa)</i> , <i>toxS</i> , Amp <sup>r</sup>                              | This study |

| Plasmid                                                     | Relevant property                                                                          | Reference  |
|-------------------------------------------------------------|--------------------------------------------------------------------------------------------|------------|
| pKT25-toxRS                                                 | pKT25-derived, <i>toxRS</i> , Km <sup>r</sup>                                              | This study |
| pSRKtc-toxRS (C293S)                                        | pSRKtc-derived, <i>toxR(C293S),toxS</i> , Tc <sup>r</sup>                                  | This study |
| pSRKtc-toxRS (C236S)                                        | pSRKtc-derived, <i>toxR(C236S),toxS</i> , Tc <sup>r</sup>                                  | This study |
| pSRKtc-toxRS                                                | pSRKtc-derived, <i>toxRS</i> , Tc <sup>r</sup>                                             | This study |
| pUT18C-C <sub>R</sub> -T <sub>P</sub> -P <sub>P</sub> -tcpH | pUT18C-derived, <i>toxR(1-177 aa)-tcpP(143-223 aa), tcpH</i> , Amp <sup>r</sup>            | This study |
| pUT18C-C <sub>P</sub> -T <sub>R</sub> -P <sub>R</sub>       | pUT18C-derived, <i>tcpP(1-142 aa)-toxR(178-293 aa)</i> , Amp <sup>r</sup>                  | This study |
| pUT18C-C <sub>R</sub> -T <sub>R</sub> -P <sub>P</sub> -tcpH | pUT18C-derived, <i>toxR(1-193 aa)-tcpP(177-223 aa), tcpH</i> , Amp <sup>r</sup>            | This study |
| pKNT25-AphB                                                 | pKNT25-derived, <i>aphB</i> , Km <sup>r</sup>                                              | This study |
| pUT18-AphB                                                  | pUT18-derived, <i>aphB</i> , Amp <sup>r</sup>                                              | This study |
| pKNT25-AphB(C235S)                                          | pKNT25-derived, <i>aphB(C235S)</i> , Km <sup>r</sup>                                       | This study |
| pUT18-AphB(C235S)                                           | pUT18-derived, <i>aphB(C235S)</i> , Amp <sup>r</sup>                                       | This study |
| pKNT25-ToxT                                                 | pKNT25-derived, <i>toxT</i> , Km <sup>r</sup>                                              | This study |
| pUT18-ToxT                                                  | pUT18-derived, <i>toxT</i> , Amp <sup>r</sup>                                              | This study |
| pACYC-AphB(C235S)                                           | pACYC117-derived, containing <i>bad</i> promoter, and <i>aphB(C235S)</i> , Km <sup>r</sup> | (7)        |

**Table S3.** Oligonucleotide primers used in this study.

| Oligonucleotides | Sequence (5' – 3') <sup>a</sup>           | Used in plasmid |
|------------------|-------------------------------------------|-----------------|
| toxRS-NdeI-R     | GCC <u>CATATGTT</u> TCGGATTAGGACACAACCTC  | pSRKtc-toxRS    |
| toxRS-SpeI-F     | CCG <u>ACTAGTT</u> TAAGAATTACTGAACAGTACGG |                 |

| Oligonucleotides                                                                                                                                                                                   | Sequence (5' – 3') <sup>a</sup>                                                                                                                                                                                                                                                    | Used in plasmid                                                                                                                                                     |
|----------------------------------------------------------------------------------------------------------------------------------------------------------------------------------------------------|------------------------------------------------------------------------------------------------------------------------------------------------------------------------------------------------------------------------------------------------------------------------------------|---------------------------------------------------------------------------------------------------------------------------------------------------------------------|
| toxR <sup>C293S</sup> -F<br>toxR <sup>C293S</sup> -R                                                                                                                                               | GCAAGATCCTACTCAGACACTTTGATGG<br>CCATCAAAGTGTCTGAGTAGGATCTTGC                                                                                                                                                                                                                       | Overlap PCR primer for <i>toxR</i><br>(C293S) <i>toxS</i> fragment                                                                                                  |
| toxR <sup>C236S</sup> -F<br>toxR <sup>C236S</sup> -R                                                                                                                                               | GAACTGTCCGTTAAAAAATAC<br>GTATTTTTTAACGGACAGTTC                                                                                                                                                                                                                                     | Overlap PCR primer for <i>toxR</i><br>(C236S) <i>toxS</i> fragment                                                                                                  |
| toxRS-XbaI-F1<br>toxRS-BamHI-R<br>toxRS-KpnI-R<br>toxRS-XbaI-F1                                                                                                                                    | CGC <u>TCTAGA</u> G ATGTTCCGATTAGGACAC<br>CCG <u>GGATCC</u> TTAAGAATTACTGAACAGTACGG<br>CGG <u>GGTACC</u> TTAAGAATTACTGAACAGTACGG<br>CGC <u>TCTAGA</u> G ATGTTCCGATTAGGACAC                                                                                                         | pKT25-toxRS<br>pUT18C-toxRS<br>pUT18C-toxRS(C293S)<br>pUT18C-toxRS(C236S)                                                                                           |
| toxRcyto-toxS-overlap-F<br>toxRcyto-toxS-overlap-R<br>toxRcytoTm-toxS-overlap-F                                                                                                                    | ATCCTACTCACACACTGGAGCCGATTTATTCGTCAC<br>AATAAATCGGCTCCAGTGTGTGAGTAGGATCTTGCTATGC<br>ATCCTACTCACACACGGGAAGTAAGACCGCTATCAGAATAAG<br>CAG                                                                                                                                              | pUT18C-C <sub>R</sub><br>pUT18C-C <sub>R</sub> -T <sub>R</sub>                                                                                                      |
| toxRcytoTM-toxS-overlap-R                                                                                                                                                                          | GCGGTCTTACTTCCCGTGTGTGAGTAGGATCTTGCTATGC                                                                                                                                                                                                                                           |                                                                                                                                                                     |
| toxR Tm--XbaI-F<br>toxR-Tm-peri-- KpnI-F<br>toxR cyto-XbaI-F<br>toxR cyto Tm tcpP<br>peri-overlap-R<br>toxR cyto Tm tcpP<br>peri-overlap-F<br>toxR cyto Tm tcpP<br>peri-KpnI-R<br>toxR cyto-XbaI-F | CGC <u>TCTAGA</u> GGGGAATCGACTGCTTATTC<br>CGG <u>GGTACC</u> AGTCAGGTAAAGAATTACTG<br>CGC <u>TCTAGA</u> GTTCGGATTAGGACACAAC<br>CATAACTATTGACGGC TACGCCATCGACAAC<br>GTTGTTCGATGGCGTA GCCGTCAATAGTTATG<br>CGG <u>GGTACC</u> CTAAAAATCGCTTTGAC<br>CGC <u>TCTAGA</u> GTTCGGATTAGGACACAAC | pUT18C-T <sub>R</sub> -P <sub>R</sub><br>pUT18C-C <sub>R</sub> -T <sub>R</sub> -P <sub>P</sub> -tcpH<br>pUT18C-C <sub>R</sub> -T <sub>P</sub> -P <sub>P</sub> -tcpH |

| Oligonucleotides                    | Sequence (5' – 3') <sup>a</sup>            | Used in plasmid                                       |
|-------------------------------------|--------------------------------------------|-------------------------------------------------------|
| toxR cyto tcpP<br>Tm-peri-overlap-R | GTTTATCTTCCCCCACTCAATCGATTATTCGTCAC        |                                                       |
| toxR cyto tcpP<br>Tm-peri-overlap-F | GTGACGAATAAATCGATTGAGTGGGGGAAGATAAAC       |                                                       |
| toxR cyto tcpP Tm-<br>peri-KpnI-R   | CGG <u>GGTACC</u> CTAAAAATCGCTTTGAC        |                                                       |
| tcpP-cyto- XbaI-F                   | CGC <u>TCTAGA</u> GATGGGGTATGTCCGCG        | pUT18C-C <sub>P</sub> -T <sub>R</sub> -P <sub>R</sub> |
| tcpP cyto toxR Tm<br>peri-overlap-R | CGATTCCCCAAGTTTGGAGCGTTTATCTTCCCCCAC       |                                                       |
| tcpP cyto toxR Tm<br>peri-overlap-F | GTGGGGGAAGATAAAC GCTCCAACTTGGGGAATCG       |                                                       |
| tcpP cyto toxR Tm peri-<br>KpnI-R   | CGGGGTACC GCATAGCAAGATCCTACTCACACAC        |                                                       |
| toxT-F-PstI                         | G <u>ACTGCAGG</u> ATTGGGAAAAAATCTTTTCAAAC  | pKNT25-toxT                                           |
| toxT-R-KpnI                         | GT <u>GGTACC</u> GCTTCTGCAACTCCTGTCAAC     | pUT18-toxT                                            |
| aphB-F-PstI                         | GCGCTGCAGGATGCAACATAATGTGTCAG              | pKNT25-aphB                                           |
| aphB-R-EcoRI                        | GCG <u>GAAATTC</u> GATTGCAGGTGGTAGCCAATCAC | pUT18-aphB and their<br>C235S mutants                 |

<sup>a</sup>Restriction sites are underlined.

<sup>b</sup>Bold letters indicate amino acid change.

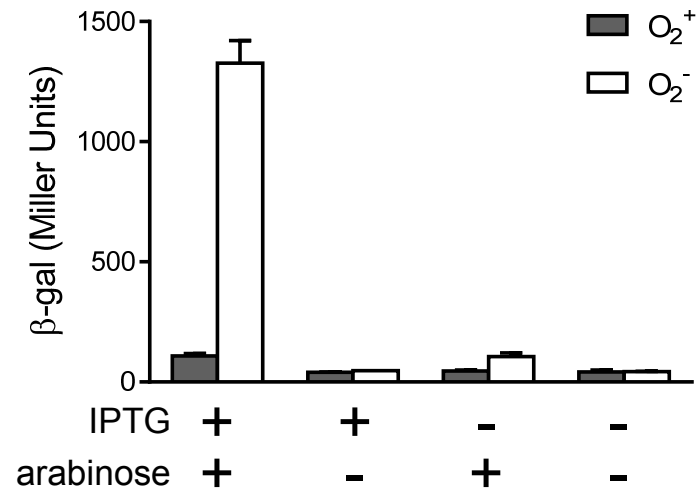

**Fig. S1. Both ToxR and TcpP are required for *toxT* expression.**  $\Delta toxRS \Delta tcpPH$  mutants containing  $P_{BAD-tcpPH}$ ,  $P_{lac-toxRS}$  and  $P_{toxT-lacZ}$  reporter plasmids were grown in AKI aerobically or anaerobically with or without 0.01% arabinose and 1  $\mu$ M IPTG until  $OD_{600} \approx 0.3$ .  $\beta$ -galactosidase activity was then measured. Data represent the mean  $\pm$  SD of three independent experiments.

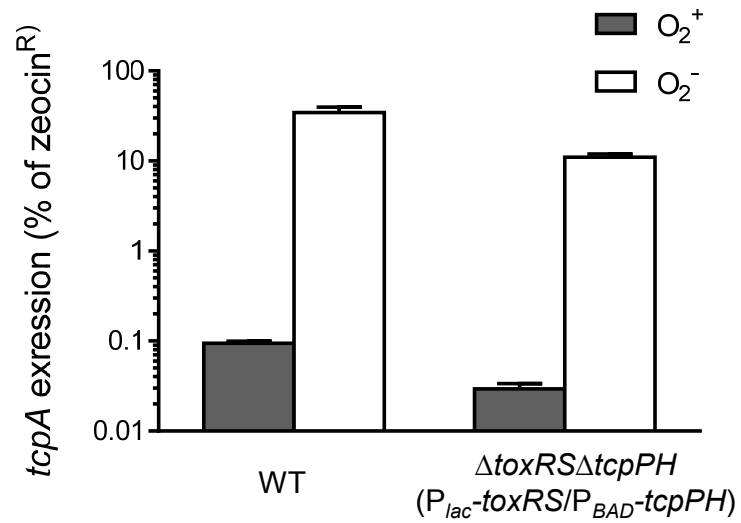

**Fig. S2. The effects of ToxR-TcpP interaction on *tcpA* expression.**  $\Delta toxRS \Delta tcpPH$  mutants containing P<sub>BAD</sub>-*tcpPH*, P<sub>lac</sub>-*toxRS* and P<sub>toxT</sub>-*lacZ* reporter plasmids were grown in AKI aerobically or anaerobically with or without 0.01% arabinose and 1  $\mu$ M IPTG until OD<sub>600</sub>  $\approx$  0.3. This strain also harbored a P<sub>tcpA</sub>-*sh ble* reporter (7). The cultures were then treated with 25  $\mu$ g/ml zeocin in 0.5x LB (pH 8.5) for 30' and the percentage of zeocinR cells were calculated based on the CFU counting.



## References

1. **Karimova G, Pidoux J, Ullmann A, Ladant D.** 1998. A bacterial two-hybrid system based on a reconstituted signal transduction pathway. *Proc Natl Acad Sci U S A* **95**:5752-5756.
2. **Yang M, Liu Z, Hughes C, Stern AM, Wang H, Zhong Z, Kan B, Fenical W, Zhu J.** 2013. Bile salt-induced intermolecular disulfide bond formation activates *Vibrio cholerae* virulence. *Proc Natl Acad Sci U S A*.
3. **Joelsson A, Z. Liu, Zhu. J.** 2006. Genetic and Phenotypic Diversity of Quorum Sensing Systems in Clinical and Environmental Isolates of *Vibrio cholerae*. *Infect. Immunity* **74**:1141-1147.
4. **Metcalf WW, Jiang W, Daniels LL, Kim SK, Haldimann A, Wanner BL.** 1996. Conditionally replicative and conjugative plasmids carrying lacZ alpha for cloning, mutagenesis, and allele replacement in bacteria. *Plasmid* **35**:1-13.
5. **Khan SR, Gaines J, Roop RM, 2nd, Farrand SK.** 2008. Broad-host-range expression vectors with tightly regulated promoters and their use to examine the influence of TraR and TraM expression on Ti plasmid quorum sensing. *Appl Environ Microbiol* **74**:5053-5062.
6. **Hsiao A, Xu X, Kan B, Kulkarni RV, Zhu J.** 2009. Direct regulation by the *Vibrio cholerae* regulator ToxT to modulate colonization and anticolonization pilus expression. *Infect Immun* **77**:1383-1388.
7. **Liu Z, Miyashiro T, Tsou A, Hsiao A, Goulian M, Zhu J.** 2008. Mucosal penetration primes *Vibrio cholerae* for host colonization by repressing quorum sensing. *Proc Natl Acad Sci U S A* **105**:9769-9774.
